# Supplementary material for: Measurement report: Vertical and temporal variability in the near-surface ozone production rate and sensitivity in an urban area in the Pearl River Delta region, China
Source: Copernicus journal article supplement (doi:10.5194/acp-24-9805-2024), 2024-09-05
Supplement: Supplementary file 1 [file acp-24-9805-2024-supplement.pdf]

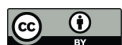

*Supplement of*

**Measurement report: Vertical and temporal variability in the near-surface ozone production rate and sensitivity in an urban area in the Pearl River Delta region, China**

**Jun Zhou et al.**

*Correspondence to:* Bin Yuan (byuan@jnu.edu.cn), Xiao-Bing Li (lixiaobing@jnu.edu.cn), and Min Shao (mshao@jnu.edu.cn)

The copyright of individual parts of the supplement might differ from the article licence.

## S1. Supplemental figures to the main text

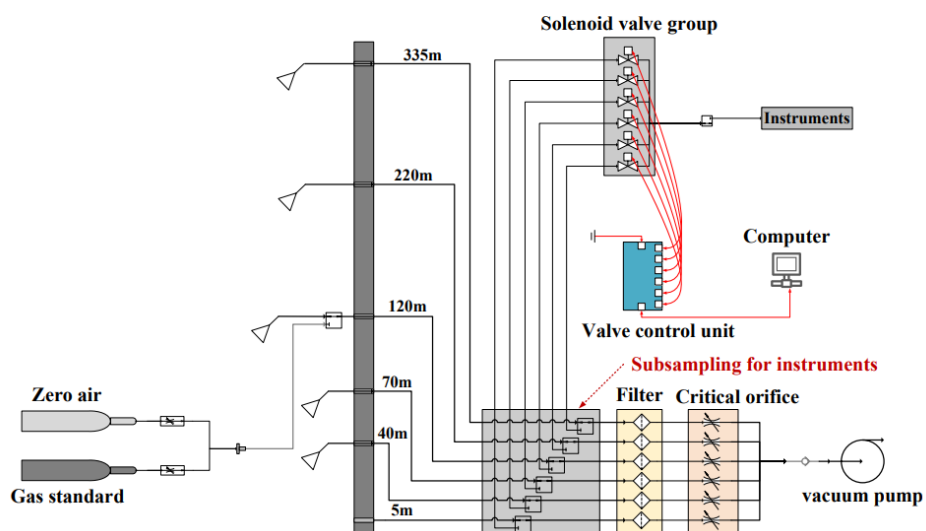

**Figure S1.** A simple schematic illustration of the vertical observation system on the SMT and locations of the six sampling inlets for measuring atmospheric gaseous species (Li et al., 2023).

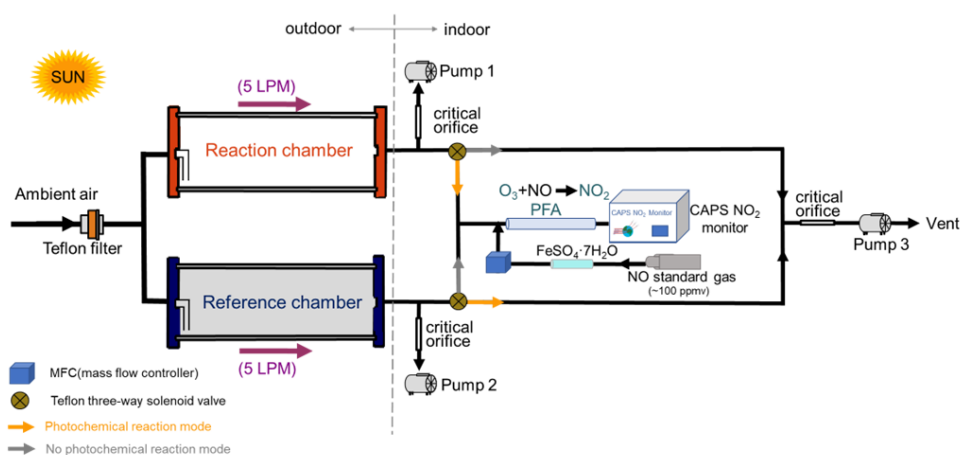

**Figure S2.** Schematic of the NPOPR detection system (Hao et al., 2023).

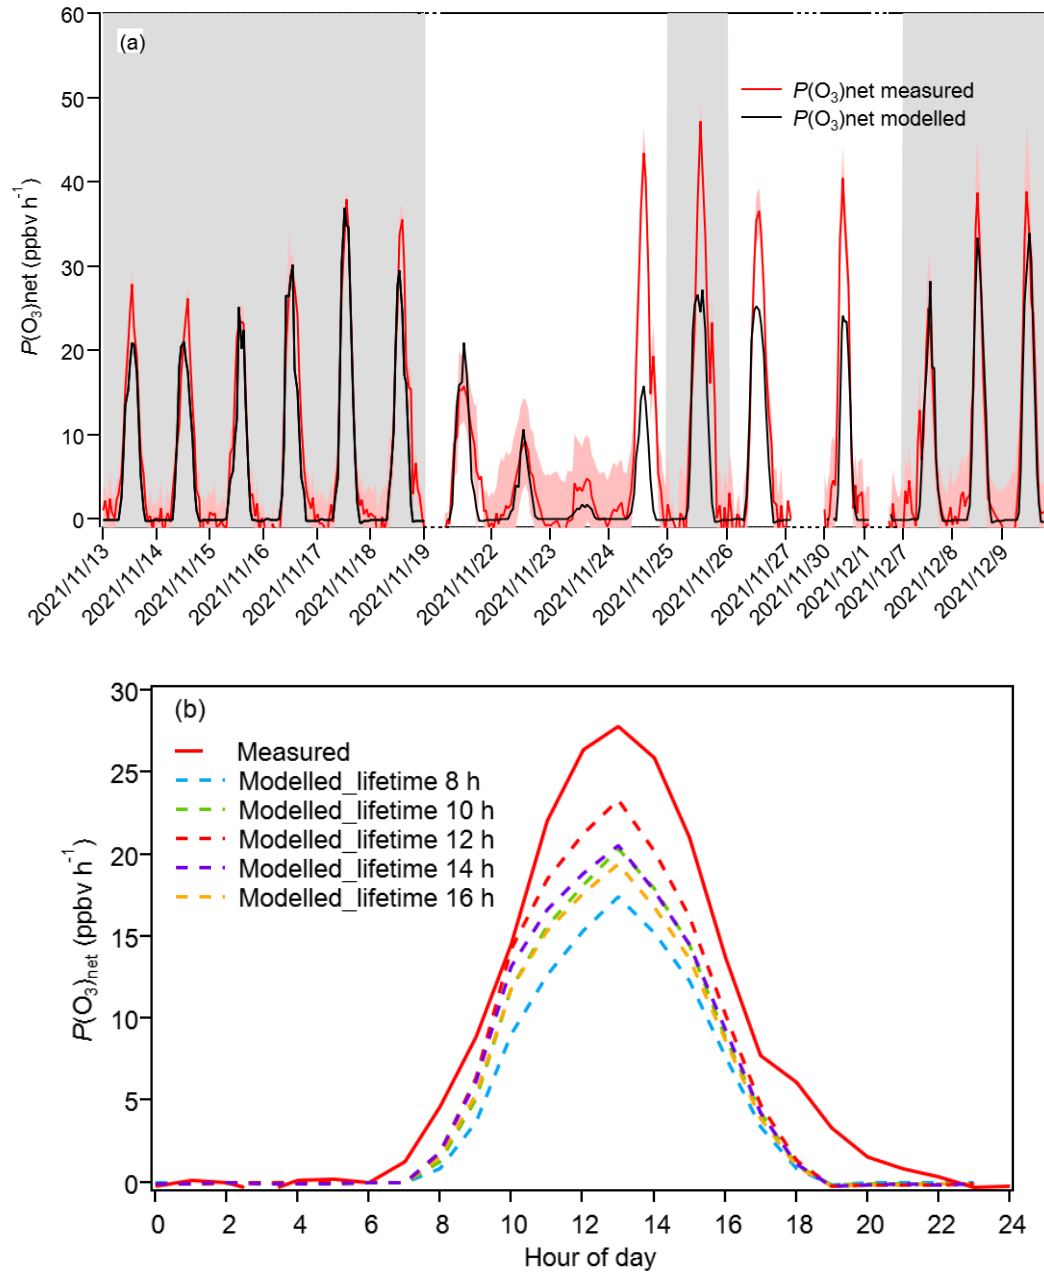

**Figure S3. Measured and modelled  $P(O_3)_{net}$  during the observation period from 13 November-9 December 2021.**

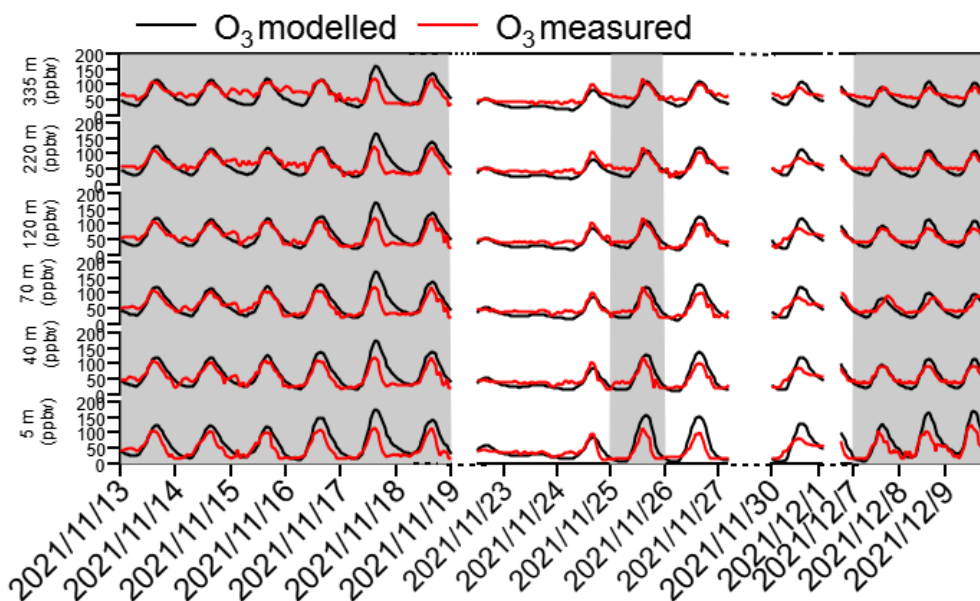

Figure S4. Measured and modelled O<sub>3</sub> concentrations at different heights during the observation period from 13 November-9 December 2021. The gray columns show the typical ozone episodes that occurred.

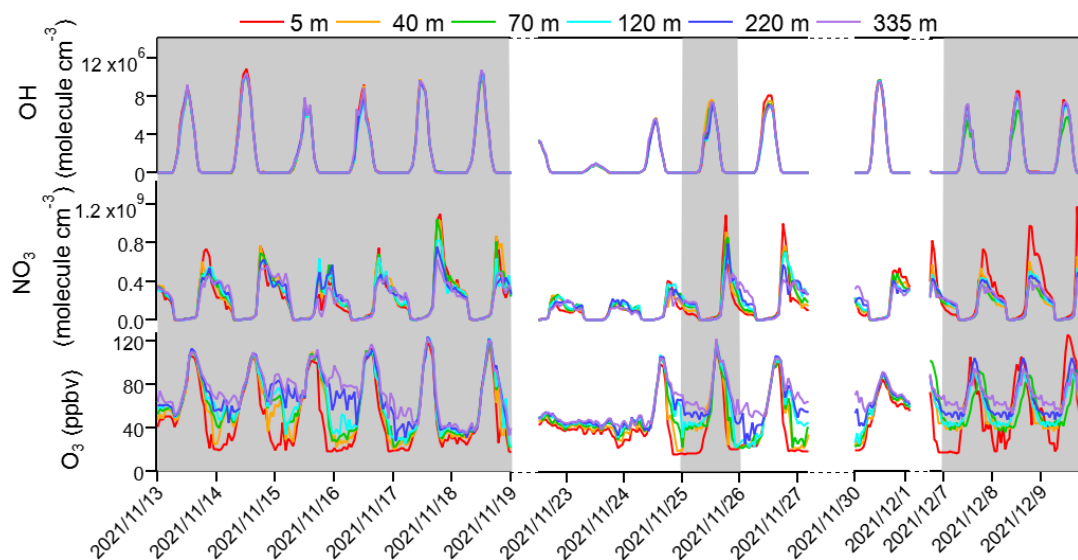

Figure S5. Time series of model-simulated OH and NO<sub>3</sub> concentrations in molecule cm<sup>-3</sup>, and measured O<sub>3</sub> concentrations in ppbv at six different heights during 13 November-9 December 2021, at SZMGT, the gray columns show the typical ozone pollution episodes that occurred.

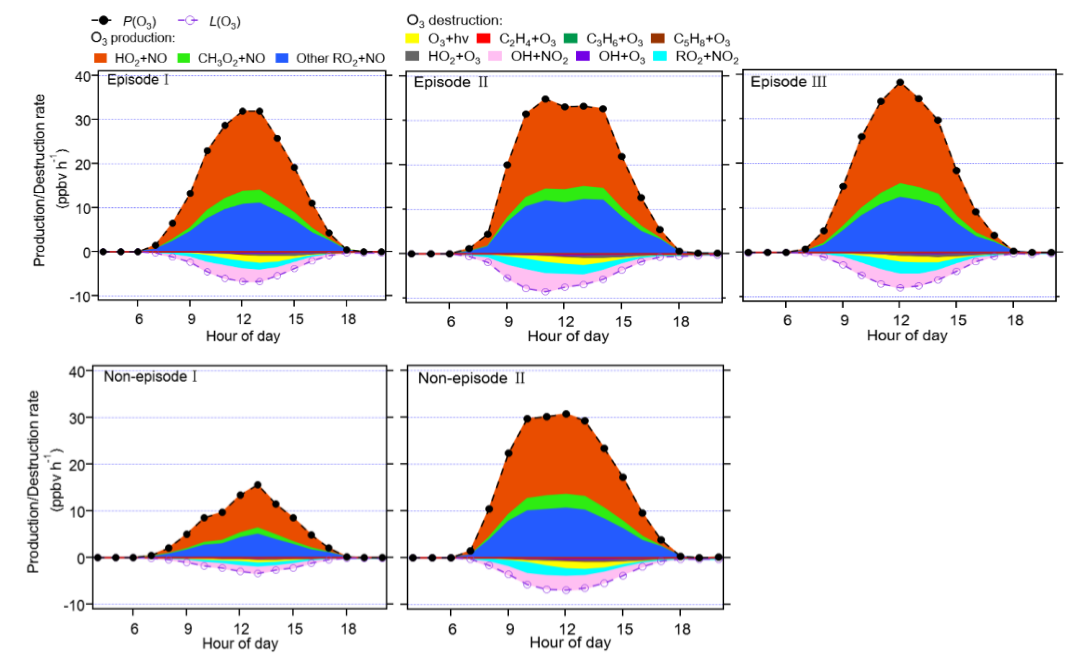

**Figure S6.** Average diurnal cycles of the model-simulated O<sub>3</sub> production and destruction rates at 5 m ground level during different episodes/non-episodes over the observation period.

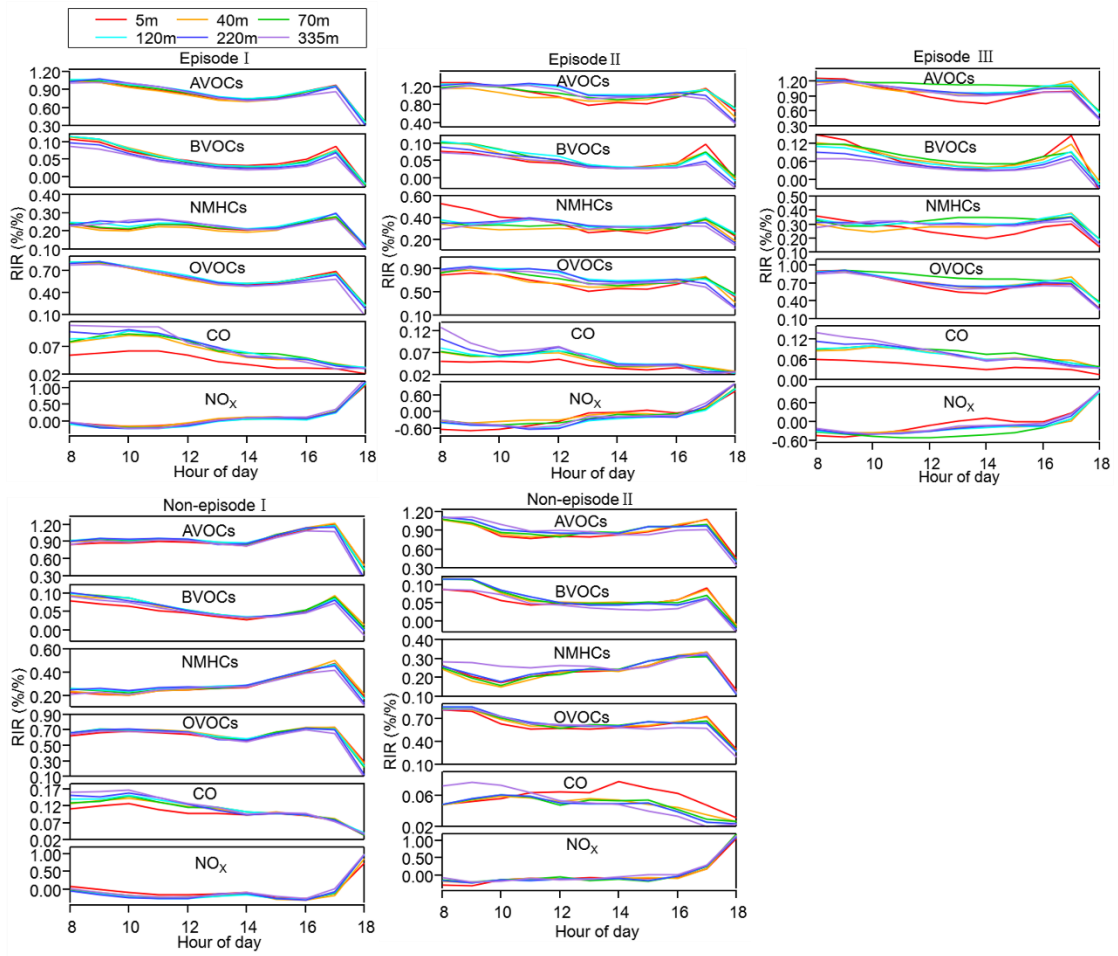

**Figure S7. RIRs for O<sub>3</sub>-precursor groups at different heights during local daytime (6:00-18:00).**

## S2. Supplemental tables to the main text

**Table S1. Modelled O<sub>3</sub> production and destruction reactions and their reaction rates used in MCM in this study**

| Reactions                                                                                  | Rate coefficient / unit                                                                                                                                                                                                                                                                                                                                                                                                                                                                                         | Number |
|--------------------------------------------------------------------------------------------|-----------------------------------------------------------------------------------------------------------------------------------------------------------------------------------------------------------------------------------------------------------------------------------------------------------------------------------------------------------------------------------------------------------------------------------------------------------------------------------------------------------------|--------|
| O <sub>3</sub> production pathways ( $P(O_3)$ )                                            |                                                                                                                                                                                                                                                                                                                                                                                                                                                                                                                 |        |
| RO <sub>2</sub> + NO→RO + NO <sub>2</sub>                                                  | $2.7 \times 10^{-12} \times \exp(360/T)$ / molecules <sup>-1</sup> cm <sup>3</sup> s <sup>-1</sup>                                                                                                                                                                                                                                                                                                                                                                                                              | (R1)   |
| HO <sub>2</sub> + NO→OH + NO <sub>2</sub>                                                  | $3.45 \times 10^{-12} \times \exp(270/T)$ / molecules <sup>-1</sup> cm <sup>3</sup> s <sup>-1</sup>                                                                                                                                                                                                                                                                                                                                                                                                             | (R2)   |
| O <sub>3</sub> destruction pathways ( $D(O_3)$ )                                           |                                                                                                                                                                                                                                                                                                                                                                                                                                                                                                                 |        |
| O <sub>3</sub> + hv → O <sup>1</sup> D + O <sub>2</sub>                                    | Measured $JO^1D$ / s <sup>-1</sup>                                                                                                                                                                                                                                                                                                                                                                                                                                                                              | (R3)   |
| O <sub>3</sub> + C <sub>2</sub> H <sub>4</sub> → HCHO + CH <sub>2</sub> OOA                | $9.1 \times 10^{-15} \times \exp(-2580/T)$ / molecules <sup>-1</sup> cm <sup>3</sup> s <sup>-1</sup>                                                                                                                                                                                                                                                                                                                                                                                                            | (R4)   |
| O <sub>3</sub> + C <sub>3</sub> H <sub>6</sub> → CH <sub>2</sub> OOB + CH <sub>3</sub> CHO | $2.75 \times 10^{-15} \times \exp(-1880/T)$ / molecules <sup>-1</sup> cm <sup>3</sup> s <sup>-1</sup>                                                                                                                                                                                                                                                                                                                                                                                                           | (R5)   |
| O <sub>3</sub> + C <sub>3</sub> H <sub>6</sub> → CH <sub>3</sub> CHOOA + HCHO              | $2.75 \times 10^{-15} \times \exp(-1880/T)$ / molecules <sup>-1</sup> cm <sup>3</sup> s <sup>-1</sup>                                                                                                                                                                                                                                                                                                                                                                                                           | (R6)   |
| O <sub>3</sub> + C <sub>5</sub> H <sub>8</sub> → CH <sub>2</sub> OOE + MACR                | $3.09 \times 10^{-15} \times \exp(-1995/T)$ / molecules <sup>-1</sup> cm <sup>3</sup> s <sup>-1</sup>                                                                                                                                                                                                                                                                                                                                                                                                           | (R7)   |
| O <sub>3</sub> + C <sub>5</sub> H <sub>8</sub> → CH <sub>2</sub> OOE + MVK                 | $2.06 \times 10^{-15} \times \exp(-1995/T)$ / molecules <sup>-1</sup> cm <sup>3</sup> s <sup>-1</sup>                                                                                                                                                                                                                                                                                                                                                                                                           | (R8)   |
| O <sub>3</sub> + C <sub>5</sub> H <sub>8</sub> → HCHO + MACROOA                            | $3.09 \times 10^{-15} \times \exp(-1995/T)$ / molecules <sup>-1</sup> cm <sup>3</sup> s <sup>-1</sup>                                                                                                                                                                                                                                                                                                                                                                                                           | (R9)   |
| O <sub>3</sub> + C <sub>5</sub> H <sub>8</sub> → HCHO + MVKOOA                             | $2.06 \times 10^{-15} \times \exp(-1995/T)$ / molecules <sup>-1</sup> cm <sup>3</sup> s <sup>-1</sup>                                                                                                                                                                                                                                                                                                                                                                                                           | (R10)  |
| O <sub>3</sub> + HO <sub>2</sub> → OH                                                      | $2.03 \times 10^{-16} \times (T/300)^{4.57} \times \exp(693/T)$ / molecules <sup>-1</sup> cm <sup>3</sup> s <sup>-1</sup>                                                                                                                                                                                                                                                                                                                                                                                       | (R11)  |
| RO <sub>2</sub> + NO <sub>2</sub> → peroxy nitrates                                        | $(3.28 \times 10^{-28} \times 7.24 \times 10^{18} \times P/T \times (T/300)^{-6.87} \times 1.125 \times 10^{-11} \times (T/300)^{-1.105} \times 10^{(\log_{10}(0.30)/(1+(\log_{10}(2.916 \times 10^{-17} \times 7.24 \times 10^{18} \times P/T \times (T/300)^{-5.765})/(0.75-1.27 \times \log_{10}(0.30)))^2)))/(3.28 \times 10^{-28} \times 7.24 \times 10^{18} \times P/T \times (T/300)^{-6.87} + 1.125 \times 10^{-11} \times (T/300)^{-1.105})$ / molecules <sup>-1</sup> cm <sup>3</sup> s <sup>-1</sup> | (R12)  |
| NO <sub>2</sub> + OH → HNO <sub>3</sub>                                                    | $(3.2 \times 10^{-30} \times 7.24 \times 10^{18} \times P/T \times (T/300)^{-4.5}) \times 3 \times 10^{-11} \times 10^{(\log_{10}(0.41)/(1+(\log_{10}((3.2 \times 10^{-30} \times 7.24 \times 10^{18} \times P/T \times (T/300)^{-4.5})/(3 \times 10^{-11}))/((0.75-1.27 \times (\log_{10}(0.41))))^2)))/(3.2 \times 10^{-30} \times 7.24 \times 10^{18} \times P/T \times (T/300)^{-4.5} + 3 \times 10^{-11})$ / molecules <sup>-1</sup> cm <sup>3</sup> s <sup>-1</sup>                                       | (R13)  |
| O <sub>3</sub> + OH → HO <sub>2</sub>                                                      | $1.70 \times 10^{-12} \times \exp(-940/T)$ / molecules <sup>-1</sup> cm <sup>3</sup> s <sup>-1</sup>                                                                                                                                                                                                                                                                                                                                                                                                            | (R14)  |

**Table S2. Measured VOCs concentrations during the observation periods at SZMGT (units: pptv).**

| Chemicals          | Classification | Mean±SD (pptv) |            |             |               |                |
|--------------------|----------------|----------------|------------|-------------|---------------|----------------|
|                    |                | Episode I      | Episode II | Episode III | Non-episode I | Non-episode II |
| Aromatics          |                | 6738±5151      | 15147±8995 | 7107±5771   | 4748±3343     | 10530±10027    |
| toluene            | NMHC/ AVOC     | 3336±2496      | 7864±4298  | 3682±2648   | 2364±1697     | 5281±4919      |
| <i>m/p</i> -xylene | NMHC/ AVOC     | 1444±1188      | 3097±2069  | 1390±1354   | 968±768       | 2223±2279      |

|                          |            |             |             |             |             |             |
|--------------------------|------------|-------------|-------------|-------------|-------------|-------------|
| ethylbenzene             | NMHC/ AVOC | 613±504     | 1315±878    | 590±575     | 411±297     | 944±968     |
| <i>o</i> -xylene         | NMHC/ AVOC | 593±489     | 1273±850    | 571±556     | 398±288     | 914±937     |
| benzene                  | NMHC/ AVOC | 445±227     | 819±349     | 527±316     | 382±182     | 654±399     |
| styrene                  | NMHC/ AVOC | 137±119     | 379±332     | 159±188     | 106±93      | 246±276     |
| 1,2,4-trimethylbenzene   | NMHC/ AVOC | 36±27       | 84±46       | 39±28       | 25±18       | 57±53       |
| <i>m</i> -ethyltoluene   | NMHC/ AVOC | 35±26       | 82±45       | 38±28       | 25±18       | 55±51       |
| <i>p</i> -ethyltoluene   | NMHC/ AVOC | 19±14       | 45±25       | 21±15       | 14±10       | 30±28       |
| <i>n</i> -propylbenzene  | NMHC/ AVOC | 19±14       | 44±24       | 21±15       | 13±10       | 30±28       |
| <i>o</i> -ethyltoluene   | NMHC/ AVOC | 18±14       | 43±24       | 20±15       | 13±9        | 29±27       |
| isopropylbenzene         | NMHC/ AVOC | 12±9        | 28±15       | 13±10       | 9±6         | 19±18       |
| 1,2,3-trimethylbenzene   | NMHC/ AVOC | 11±8        | 26±14       | 12±9        | 8±6         | 17±16       |
| <i>p</i> -diethylbenzene | NMHC/ AVOC | 8±6         | 20±11       | 9±7         | 6±4         | 13±12       |
| 1,3,5-trimethylbenzene   | NMHC/ AVOC | 7±5         | 13±9        | 7±5         | 5±3         | 11±10       |
| <i>m</i> -diethylbenzene | NMHC/ AVOC | 4±3         | 10±6        | 5±3         | 3±2         | 7±6         |
| OVOCs                    |            | 39720±20318 | 66267±28451 | 48377±29973 | 26783±15486 | 47046±33037 |
| methanol                 | OVOC/AVOC  | 8418±3917   | 15131±5681  | 10324±6640  | 6136±3448   | 10682±7116  |
| formaldehyde             | OVOC/AVOC  | 9449±4089   | 11853±3042  | 10562±4843  | 5303±3053   | 9165±4511   |
| ethanol                  | OVOC/AVOC  | 7710±3756   | 14390±7288  | 10535±6910  | 6005±3201   | 10312±8417  |
| acetone                  | OVOC/AVOC  | 4365±2953   | 7549±4676   | 5701±3897   | 2699±1586   | 4275±2829   |
| hydroxyacetone           | OVOC/AVOC  | 4047±2445   | 7007±2751   | 4543±3121   | 2766±1884   | 5448±4699   |
| acetaldehyde             | OVOC/AVOC  | 2532±1355   | 4367±1729   | 3007±1880   | 1697±956    | 3126±2244   |
| methyl ethyl ketone      | OVOC/AVOC  | 2310±1432   | 4723±2757   | 2715±2226   | 1653±984    | 3171±2722   |
| acrolein                 | OVOC/AVOC  | 512±191     | 731±263     | 605±227     | 301±208     | 487±295     |
| methyl vinyl ketone      | OVOC/AVOC  | 179±70      | 207±80      | 185±98      | 89±73       | 170±78      |
| methacrylaldehyde        | OVOC/AVOC  | 124±49      | 144±55      | 128±68      | 62±51       | 118±54      |
| <i>m</i> -cresol         | OVOC/AVOC  | 50±40       | 97±50       | 46±41       | 43±25       | 55±37       |
| phenol                   | OVOC/AVOC  | 24±20       | 66±79       | 26±22       | 28±18       | 36±35       |
| Acetylene                |            | 1836±1259   | 3967±2168   | 1857±1336   | 1192±855    | 2664±2481   |
| Acetylene                | NMHC/ AVOC | 1836±1259   | 3967±2168   | 1857±1336   | 1192±855    | 2664±2481   |
| Alkanes                  |            | 28108±21030 | 66256±36213 | 31017±22307 | 19916±14296 | 44495±41443 |
| <i>n</i> -butane         | NMHC/ AVOC | 7972±5965   | 18793±10271 | 8797±6327   | 5649±4055   | 12620±11755 |
| propane                  | NMHC/ AVOC | 6417±4801   | 15127±8268  | 7081±5093   | 4547±3264   | 10159±9462  |
| isobutane                | NMHC/ AVOC | 4513±3376   | 10637±5814  | 4980±3581   | 3198±2295   | 7144±6654   |
| ethane                   | NMHC/ AVOC | 3134±2345   | 7388±4038   | 3458±2487   | 2221±1594   | 4961±4621   |
| isopentane               | NMHC/ AVOC | 1550±1160   | 3654±1997   | 1710±1230   | 1098±788    | 2454±2285   |



|                         |            |           |           |           |           |           |
|-------------------------|------------|-----------|-----------|-----------|-----------|-----------|
| <i>n</i> -pentane       | NMHC/ AVOC | 1422±1064 | 3353±1832 | 1569±1128 | 1008±723  | 2251±2097 |
| <i>n</i> -hexane        | NMHC/ AVOC | 574±429   | 1352±739  | 633±455   | 406±291   | 908±846   |
| 2-methylpentane         | NMHC/ AVOC | 428±321   | 1010±552  | 473±340   | 304±218   | 678±632   |
| 3-methylpentane         | NMHC/ AVOC | 383±286   | 902±493   | 422±304   | 271±195   | 606±564   |
| 3-methylhexane          | NMHC/ AVOC | 228±171   | 538±294   | 252±181   | 162±116   | 361±336   |
| 2-methylhexane          | NMHC/ AVOC | 177±132   | 417±228   | 195±140   | 125±90    | 280±261   |
| cyclohexane             | NMHC/ AVOC | 176±      | 414±227   | 194±140   | 125±89    | 278±259   |
| <i>n</i> -heptane       | NMHC/ AVOC | 161±121   | 380±208   | 178±120   | 114±82    | 255±238   |
| methylcyclopentane      | NMHC/ AVOC | 113±85    | 267±146   | 125±90    | 80±58     | 180±167   |
| 2,3-dimethylbutane      | NMHC/ AVOC | 110±83    | 260±142   | 122±88    | 78±56     | 175±163   |
| <i>n</i> -octane        | NMHC/ AVOC | 99±74     | 233±127   | 109±78    | 70±50     | 156±146   |
| methylcyclohexane       | NMHC/ AVOC | 92±69     | 217±119   | 102±73    | 65±47     | 146±136   |
| 2,3-dimethylpentane     | NMHC/ AVOC | 86±64     | 203±111   | 95±68     | 78±56     | 136±127   |
| 2,2-dimethylbutane      | NMHC/ AVOC | 64±48     | 151±83    | 71±51     | 46±33     | 102±95    |
| cyclopentane            | NMHC/ AVOC | 63±47     | 149±82    | 70±50     | 45±32     | 100±93    |
| <i>n</i> -dodecane      | NMHC/ AVOC | 62±46     | 145±80    | 68±49     | 44±31     | 98±91     |
| 2,4-dimethylpentane     | NMHC/ AVOC | 49±37     | 116±64    | 54±39     | 35±25     | 78±73     |
| <i>n</i> -decane        | NMHC/ AVOC | 44±33     | 104±57    | 49±35     | 31±22     | 70±65     |
| <i>n</i> -nonane        | NMHC/ AVOC | 42±32     | 100±55    | 47±34     | 30±22     | 67±62     |
| <i>n</i> -undecane      | NMHC/ AVOC | 37±28     | 88±48     | 41±30     | 26±19     | 59±55     |
| 3-methylheptane         | NMHC/ AVOC | 37±27     | 84±46     | 32±23     | 25±18     | 57±53     |
| 2-methylheptane         | NMHC/ AVOC | 29±21     | 68±37     | 39±28     | 20±15     | 45±42     |
| 2,2,4-trimethylpentane  | NMHC/ AVOC | 26±19     | 61±34     | 29±21     | 18±13     | 41±38     |
| 2,3,4-trimethylpentane  | NMHC/ AVOC | 19±14     | 44±24     | 21±15     | 13±10     | 30±28     |
| Alkenes                 | NMHC/ AVOC | 2202±1561 | 5043±2664 | 2492±1716 | 1530±1119 | 3422±3120 |
| ethylene                | NMHC/ AVOC | 1494±1326 | 3187±1742 | 1492±1073 | 958±688   | 2141±1994 |
| propylene               | NMHC/ AVOC | 412±365   | 878±480   | 411±296   | 264±190   | 590±549   |
| 1-butene                | NMHC/ AVOC | 163±145   | 348±190   | 163±117   | 105±75    | 234±218   |
| 1-pentene               | NMHC/ AVOC | 29±26     | 62±34     | 29±21     | 19±13     | 42±39     |
| 1-hexene                | NMHC/ AVOC | 15±13     | 31±47     | 15±11     | 9±7       | 21±20     |
| <i>trans</i> -2-butene  | NMHC/ AVOC | 11±10     | 24±13     | 11±8      | 7±5       | 16±15     |
| <i>cis</i> -2-butene    | NMHC/ AVOC | 11±10     | 24±14     | 11±8      | 7±5       | 16±15     |
| <i>trans</i> -2-pentene | NMHC/ AVOC | 5±4       | 10±6      | 5±3       | 3±2       | 4±4       |
| <i>cis</i> -2-pentene   | NMHC/ AVOC | 3±3       | 6±3       | 3±2       | 2±1       | 7±6       |
| isoprene                | NMHC/ BVOC | 277±185   | 471±165   | 351±176   | 156±132   | 351±260   |

**Table S3. The median values of IOA, NMB, and NME between measured and modelled  $P(O_3)_{net}$  (or  $O_3$ ) for different episodes and non-episodes.**

| Parameters |                | P1    | P2    | P3    | C1    | C2    |
|------------|----------------|-------|-------|-------|-------|-------|
| IOA        | $P(O_3)_{net}$ | 0.95  | 0.80  | 0.96  | 0.98  | 0.91  |
|            | $O_3$          | 0.86  | 0.78  | 0.84  | 0.73  | 0.71  |
| NMB        | $P(O_3)_{net}$ | -0.16 | -0.37 | -0.10 | -0.21 | -0.25 |
|            | $O_3$          | 0.26  | 0.57  | 0.34  | 0.23  | 0.63  |
| NME        | $P(O_3)_{net}$ | 0.23  | 0.43  | 0.24  | 0.36  | 0.30  |
|            | $O_3$          | 0.32  | 0.59  | 0.40  | 0.42  | 0.65  |

**Table S4. Top three VOCs species with the highest OFP ( $g\ cm^{-3}$ ) values, for both NMHCs and OVOCs groups during various episodes and non-episodes.**

| Classification | Episode I                      | Episode II                     | Episode III                    | Non-episode I                  | Non-episode II                 |
|----------------|--------------------------------|--------------------------------|--------------------------------|--------------------------------|--------------------------------|
| NMHCs          | toluene<br>4.64E-11            | toluene<br>4.42E-11            | toluene<br>6.92E-11            | toluene<br>1.27E-10            | toluene<br>4.91E-11            |
|                | <i>m/p</i> -xylene<br>3.37E-11 | <i>m/p</i> -xylene<br>2.96E-11 | <i>m/p</i> -xylene<br>4.44E-11 | <i>m/p</i> -xylene<br>8.34E-11 | <i>m/p</i> -xylene<br>3.31E-11 |
|                | n-butane<br>2.07E-11           | n-butane<br>1.98E-11           | n-butane<br>3.09E-11           | n-butane<br>5.69E-11           | n-butane<br>2.19E-11           |
|                | formaldehyde<br>1.12E-10       | formaldehyde<br>6.64E-11       | formaldehyde<br>1.5E-10        | formaldehyde<br>1.27E-10       | formaldehyde<br>8.44E-11       |
| OVOCs          | hydroxyacetone<br>3.33E-11     | hydroxyacetone<br>2.67E-11     | hydroxyacetone<br>4.82E-11     | hydroxyacetone<br>5.67E-11     | hydroxyacetone<br>3.03E-11     |
|                | acetaldehyde<br>2.51E-11       | acetaldehyde<br>1.96E-11       | acetaldehyde<br>3.66E-11       | acetaldehyde<br>4.34E-11       | ethanol<br>2.27E-11            |

### S3. The experiments concerning the light-enhanced loss of O<sub>3</sub>

*The light-enhanced loss of O<sub>3</sub> in the reaction and reference chambers* at 5 L min<sup>-1</sup> (the flow rate used during the observation campaign in this study) was investigated by carrying out the following outdoor experiment: the O<sub>3</sub> with a mixing ratio of approximately 130 ppbv generated by the O<sub>3</sub> generator (P/N 97-0067-02, Analytic Jena US, USA) was injected into both the reaction and reference chambers. We flowed zero air together with the generated O<sub>3</sub> into these chambers, which are located outdoors, to ensure there was no photochemical O<sub>3</sub> production. This setup allowed us to observe the real changes in photolysis frequencies of different species during daytime. The  $J(\text{O}^1\text{D})$ ,  $T$ , RH,  $P$  and O<sub>3</sub> mixing ratios at the inlet and outlet of the reaction and reference chambers were measured simultaneously. The  $T$  and RH were measured with a thermometer (Vaisala, HMP110, USA). The light-enhanced loss coefficient of O<sub>3</sub> ( $\gamma$ ) was calculated using Eq. (2) described in the main text, and the relationship between  $J(\text{O}^1\text{D})$  and  $\gamma$  is shown in Fig. S8a. The obtained  $\gamma$ - $J(\text{O}^1\text{D})$  equation listed in Fig. S8a was used to correct for the light-enhanced loss of O<sub>3</sub> in the reaction and reference chambers during the daytime to exclude the influence of light-enhanced loss. The change in the O<sub>3</sub> mixing ratio after correcting for the light-enhanced loss of O<sub>3</sub> ( $d[\text{O}_3]$ ) showed no clear correlation with RH for both the reaction and reference chambers, as shown in Fig. S8b, indicating that the RH had no influence on the change in the O<sub>3</sub> mixing ratio during the observation period.

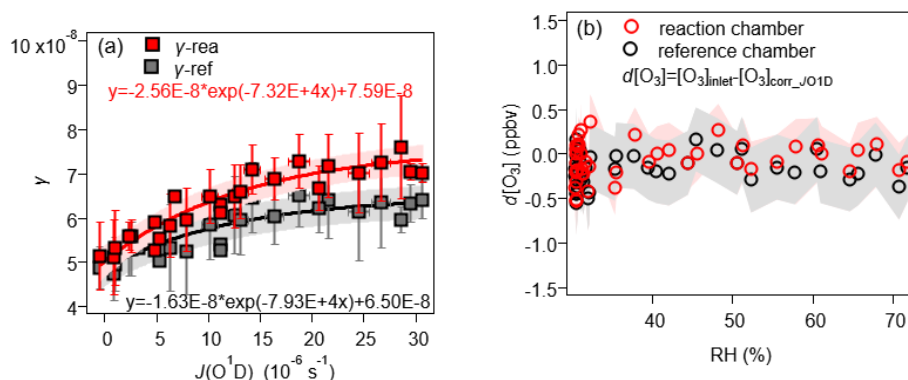

**Figure S8: The relationship between (a)  $\gamma$  and  $J(\text{O}^1\text{D})$  and (b) RH and  $d[\text{O}_3]$  in the reaction and reference chambers, calculated from the 68.3 % confidence interval of the fit lines between  $\gamma$  and  $J(\text{O}^1\text{D})$ , the shaded areas represent the maximum range of fluctuation under this confidence level.**

Furthermore, we quantified the light-enhanced loss of O<sub>3</sub> correction by comparing the  $P(O_3)_{net}$  with and without the correction, the corresponding time series are shown in Fig. S9. Results show that such a correction can increase the measured  $P(O_3)_{net}$  by 10% (25% percentile) to 24% (75% percentile), with the median value of 17%.

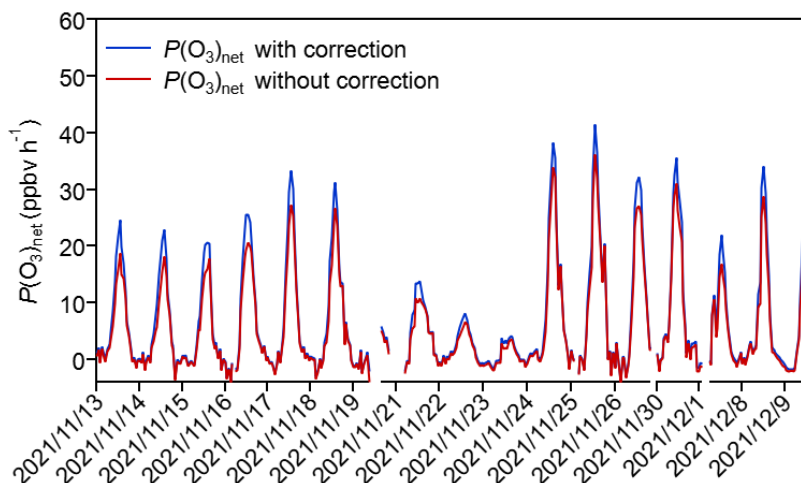

**Figure S9: The time series of  $P(O_3)_{net}$  with and without the light-enhanced loss of O<sub>3</sub> correction.**

#### S4. Measurement error of $P(O_3)_{net}$ and the LOD of the NPOPR detection system

According to the  $P(O_3)_{net}$  evaluation method listed in Eq. (1) in the main text, the measurement error of  $P(O_3)_{net}$  depends on the estimation error of O<sub>x</sub> in the reaction and reference chambers, which includes the measurement error of O<sub>x</sub> of CAPS-NO<sub>2</sub> monitor and the error caused by  $\gamma$ , and can be calculated according to Eq. (S1) :

$$(O_X)_{error} = \sqrt{(O_{X\gamma})_{error}^2 + (O_{XCAPS})_{error}^2} \quad (S1)$$

where  $(O_X)_{error}$  represents the absolute error in the estimated O<sub>x</sub> concentration in the reaction and reference chambers, which results from the quadratic propagation of the absolute errors  $(O_{X\gamma})_{error}$  and  $(O_{XCAPS})_{error}$ . Here,  $(O_{X\gamma})_{error}$  denotes the error associated with the  $\gamma$ -corrected O<sub>x</sub> of the chambers, while  $(O_{XCAPS})_{error}$  signifies the measurement error of the O<sub>x</sub> measured by the CAPS-NO<sub>2</sub> monitor. The measurement error of the CAPS NO<sub>2</sub> monitor was obtained by fitting the NO<sub>2</sub> calibration results with a 68.3 % confidence level. The blue line in Fig. S10 represents the maximum range of fluctuation under this confidence level.

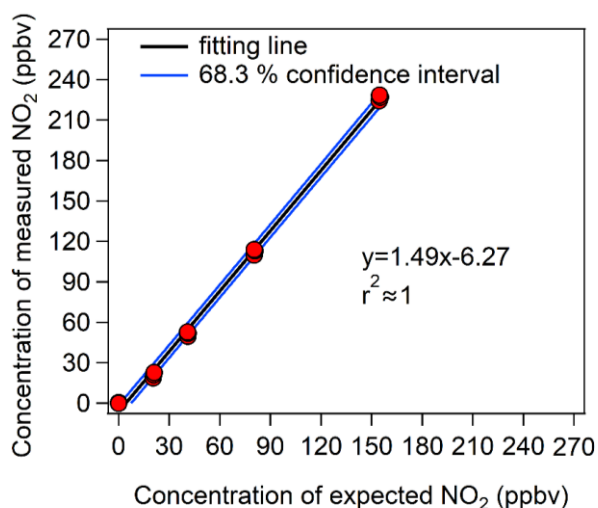

**Figure S10: Calibration results of the CAPS NO<sub>2</sub> monitor at different NO<sub>2</sub> mixing ratios. The y-axis represents the NO<sub>2</sub> mixing ratios measured by the CAPS NO<sub>2</sub> monitor, and the x-axis represents the prepared NO<sub>2</sub> mixing ratios prepared from the diluted NO<sub>2</sub> standard gas.**

$(O_{X_{CAPS}})_{error}$  was then calculated from the fluctuation range of the 68.3 % confidence interval of the calibration curve. The relationship between  $(O_{X_{CAPS}})_{error}$  and the measured Ox value ( $[Ox]_{measured}$ ) can be expressed as a power function curve, as shown in Eq. (S2):

$$(O_{X_{CAPS}})_{error} = 9.72 \times [Ox]_{measured}^{-1.0024} \quad (S2)$$

Dry pure air was sequentially introduced into the NPOPR detection system for ~ 2 h to adjust the system, followed by dry pure air or ambient air when the CAPS NO<sub>2</sub> monitor time resolution was 1 s and the integration period was 100 s (the measurement durations for the reaction and reference chambers were both 2 min). We acknowledge that this power function has been derived from calibration data of the O<sub>x</sub> concentrations ranged from 20 ppbv to 160 ppbv. Utilizing this function outside this calibrated range, especially at very low O<sub>x</sub> concentrations, may result in errors that are disproportionately large and may not accurately capture the true variability of the measurement errors. In this study, the O<sub>x</sub> concentrations ranged from 28 to 145 ppbv, which falls into the calibration range. Consequently, this power function is deemed appropriate for estimating the  $(O_{X_{CAPS}})_{error}$  throughout the whole measurement period.

The measured O<sub>x</sub> errors may also be influenced by the light-enhanced loss of O<sub>3</sub>

in the reaction and reference chambers under ambient conditions when the light intensity (especially  $J(\text{O}^1\text{D})$ ) and  $\text{O}_3$  mixing ratios are high. Therefore, when injecting ambient air into the NPOPR system, the error of  $P(\text{O}_3)_{\text{net}}$  with a residence time of  $\tau$  can be calculated using Eq. (S3):

$$P(\text{O}_3)_{\text{net\_error}} = \frac{\sqrt{(\text{O}_{\text{X}\gamma})_{\text{rea\_error}}^2 + ((9.72 \times [\text{O}_{\text{X}}]_{\text{rea\_measured}})^{-1.0024})_{\text{rea\_std}}^2 + (\text{O}_{\text{X}\gamma})_{\text{ref\_error}}^2 + ((9.72 \times [\text{O}_{\text{X}}]_{\text{ref\_measured}})^{-1.0024})_{\text{ref\_std}}^2}}{\tau}$$

(S3)

where  $(\text{O}_{\text{X}\gamma})_{\text{rea\_error}}$  and  $(\text{O}_{\text{X}\gamma})_{\text{ref\_error}}$  represent the measurement error due to light-enhanced loss of  $\text{O}_3$  in the reaction and reference chambers, respectively, and  $((9.72 \times [\text{O}_{\text{X}}]_{\text{measured}})^{-1.0024})_{\text{rea\_std}}$  and  $((9.72 \times [\text{O}_{\text{X}}]_{\text{measured}})^{-1.0024})_{\text{ref\_std}}$  represent the standard deviation of  $\text{O}_{\text{X}}$  in the reaction and reference chambers, respectively, caused by the CAPS  $\text{NO}_2$  monitor with an integration time period of 100 s. Combined with the associated residence time  $\langle \tau \rangle$  under different flow rates, i.e.,  $\langle \tau \rangle$  was 0.063 h at a flow rate of  $5 \text{ L min}^{-1}$ . In our previous research (Hao et al., 2023), we evaluated the residence time error and determined it to be approximately 0.0007, with an average residence time of 0.063 hours at a flow rate of  $5 \text{ L min}^{-1}$ . When we considered this error in the calculation of ' $P(\text{O}_3)_{\text{net\_error}}$ ', we observed a minimal reduction in the ' $P(\text{O}_3)_{\text{net\_error}}$ ' values, ranging from 0 to 2% [0.25-0.75 percentile]. This impact is considered negligible in relation to the overall ' $P(\text{O}_3)_{\text{net\_error}}$ ' as presented in Eq. 3. Consequently, we did not consider the uncertainty associated with the residence time in our calculations. We note that this collective measurement error of  $P(\text{O}_3)_{\text{net}}$  is referred to as the measurement precision of the NPOPR detection system, which is different with the measurement accuracy of the NPOPR detection system described in Sect. 2.2.2.

The LOD of the NPOPR detection system was determined to be three times  $P(\text{O}_3)_{\text{net\_error}}$ . Since the measurement error of the CAPS  $\text{NO}_2$  monitor decreases with increasing  $\text{O}_{\text{X}}$  mixing ratios (as shown in Eq. S2), higher LODs could be obtained when injecting dry pure air into the NPOPR detection system, which were approximately 0.07, 1.4, and 2.3 ppbv  $\text{h}^{-1}$  at air flow rates of 1.3, 3, and  $5 \text{ L min}^{-1}$ , respectively. Given that the background  $\text{O}_{\text{X}}$  mixing ratios (measured by the CAPS  $\text{NO}_2$  monitor of the air in the reference chamber) changed when the ambient air was measured, the measured  $\text{O}_{\text{X}}$

errors in the reaction and reference chambers changed with the Ox mixing ratios, and the LOD must also be a function of the intrinsic ambient and photochemically formed O<sub>3</sub> and NO<sub>2</sub> mixing ratios (i.e., the Ox mixing ratios measured by the CAPS NO<sub>2</sub> monitor).

## References

Hao, Y., Zhou, J., Zhou, J. P., Wang, Y., Yang, S., Huangfu, Y., Li, X. B., Zhang, C., Liu, A., Wu, Y., Zhou, Y., Yang, S., Peng, Y., Qi, J., He, X., Song, X., Chen, Y., Yuan, B., and Shao, M.: Measuring and modeling investigation of the net photochemical ozone production rate via an improved dual-channel reaction chamber technique, *Atmos. Chem. Phys.*, 23, 9891-9910, 10.5194/acp-23-9891-2023, 2023.

Li, X.-B., Zhang, C., Liu, A., Yuan, B., Yang, H., Liu, C., Wang, S., Huangfu, Y., Qi, J., Liu, Z., He, X., Song, X., Chen, Y., Peng, Y., Zhang, X., Zheng, E., Yang, L., Yang, Q., Qin, G., Zhou, J., and Shao, M.: Assessment of long tubing in measuring atmospheric trace gases: applications on tall towers, *Environ. Sci.: Atmos.*, 3, 506-520, 10.1039/d2ea00110a, 2023.
